# Supplementary material
Source: Springer Nature journal article supplement (https://www.springermedizin.de/resource/supplementary/12878_2014_29_MOESM4_ESM.docx/9686378)
Supplement: MOESM4 [file 9686378]

|  | Diagnosis of malignant disease | Patients with CVC | Number of CVC associated thrombosis | Number of patients with CVC associated thrombosis | % of CVC associated thrombosis within the different tumor entities | % of patients with CVC associated thrombosis within the different tumor entities | % of CVC associated thrombosis in all patients with CVC |
| --- | --- | --- | --- | --- | --- | --- | --- |
| Lymphoma | 35 | 35 (100%) | 7 | 6 | 20 | 17 | 13% |
| Leukemia | 81 | 79 (98%) | 20 | 17 | 25 | 22 | 38% |
| Solid Tumor | 116 | 72 (62%) | 5 | 3 | 7 | 4 | 10% |
| CNS Tumor | 168 | 68 (40%) | 14 | 12 | 20 | 18 | 27% |
| Others | 48 | 15 (31%) | 6 | 5 | 40 | 33 | 12% |
| Total | 448 | 269 | 52 | 43 |  |  | 100% |

Table I. Distribution of CVC associated thrombosis.

Abbreviations: CNS - central nervous system, CVC - central venous catheter
